# Supplementary material for: Exploring the binding mechanisms of PDE5 with chromeno[2,3-c]pyrrol-9(2H)-one by theoretical approaches
Source: Royal Society of Chemistry journal article supplement (doi:10.1039/c8ra06405a), 2018-01-01
Supplement: c8ra06405a1.pdf [file c8ra06405a1.pdf]

## Supporting Information

**Table S1.** Binding free energy contributions of key binding-site residues calculated by the binding energy decomposition for three representative compounds( kcal/mol).

|        | cmp 17j                 |                         |                        |                        |                          | cmp 20                  |                         |                        |                        |                          |
|--------|-------------------------|-------------------------|------------------------|------------------------|--------------------------|-------------------------|-------------------------|------------------------|------------------------|--------------------------|
|        | $\Delta E_{\text{vdw}}$ | $\Delta E_{\text{ele}}$ | $\Delta G_{\text{GB}}$ | $\Delta G_{\text{SA}}$ | $\Delta G_{\text{bind}}$ | $\Delta E_{\text{vdw}}$ | $\Delta E_{\text{ele}}$ | $\Delta G_{\text{GB}}$ | $\Delta G_{\text{SA}}$ | $\Delta G_{\text{bind}}$ |
| Tyr612 | -2.10                   | -1.32                   | 1.50                   | -0.40                  | -2.32                    | -1.50                   | -1.16                   | 1.32                   | -0.30                  | -1.64                    |
| Ile768 | -1.68                   | -0.10                   | 0.08                   | -0.14                  | -1.82                    | -2.26                   | -0.14                   | 0.08                   | -0.14                  | -2.46                    |
| Val782 | -4.06                   | -0.02                   | 0.02                   | -0.32                  | -4.38                    | -5.18                   | -0.01                   | 0.20                   | -0.50                  | -5.58                    |
| Phe786 | -4.92                   | -0.50                   | 1.46                   | -1.00                  | -4.96                    | -5.50                   | -0.86                   | 1.64                   | -0.98                  | -5.70                    |
| Phe787 | -2.12                   | -0.08                   | 0.16                   | -0.02                  | -2.38                    | -0.92                   | -0.20                   | 0.58                   | -0.06                  | -0.60                    |
| Ile813 | -1.86                   | -0.50                   | 0.68                   | -0.18                  | -1.86                    | -1.46                   | -0.18                   | 0.28                   | -0.20                  | -1.58                    |
| Met816 | -3.80                   | -0.48                   | 0.70                   | -0.54                  | -4.12                    | -4.22                   | -0.10                   | 0.48                   | -0.62                  | -4.44                    |
| Gln817 | -3.02                   | -5.64                   | 4.78                   | -0.24                  | -4.14                    | -2.32                   | -2.36                   | 2.76                   | -0.24                  | -2.18                    |
| Phe820 | -7.74                   | -0.74                   | 0.58                   | -0.78                  | -7.20                    | -5.78                   | -0.48                   | 0.82                   | -0.78                  | -5.30                    |

  

|        | cmp 57                  |                         |                        |                        |                          | cmp 59                  |                         |                        |                        |                          |
|--------|-------------------------|-------------------------|------------------------|------------------------|--------------------------|-------------------------|-------------------------|------------------------|------------------------|--------------------------|
|        | $\Delta E_{\text{vdw}}$ | $\Delta E_{\text{ele}}$ | $\Delta G_{\text{GB}}$ | $\Delta G_{\text{SA}}$ | $\Delta G_{\text{bind}}$ | $\Delta E_{\text{vdw}}$ | $\Delta E_{\text{ele}}$ | $\Delta G_{\text{GB}}$ | $\Delta G_{\text{SA}}$ | $\Delta G_{\text{bind}}$ |
| Tyr612 | -1.98                   | -1.20                   | 1.44                   | -0.26                  | -2.00                    | -1.44                   | -0.24                   | 0.88                   | -0.22                  | -1.00                    |
| Ile768 | -3.18                   | -0.46                   | 0.30                   | -0.30                  | -3.62                    | -3.32                   | -0.08                   | 0.02                   | -0.32                  | -3.64                    |
| Val782 | -5.12                   | -0.20                   | 0.06                   | -0.54                  | -5.52                    | -3.58                   | -0.20                   | 0.12                   | -0.50                  | -4.18                    |
| Phe786 | -5.66                   | -0.18                   | 1.14                   | -0.54                  | -5.26                    | -3.64                   | -0.38                   | 1.10                   | -0.88                  | -3.80                    |
| Phe787 | -1.40                   | -0.02                   | 0.46                   | -0.14                  | -1.06                    | -1.34                   | -0.02                   | 0.14                   | -0.08                  | -1.32                    |
| Ile813 | -2.40                   | -0.20                   | 0.24                   | -0.18                  | -2.50                    | -1.50                   | -0.32                   | 0.40                   | -0.24                  | -1.66                    |
| Met816 | -2.08                   | -0.12                   | 0.40                   | -0.12                  | -1.94                    | -3.56                   | -0.32                   | 0.74                   | -0.56                  | -3.70                    |
| Gln817 | -3.98                   | -4.30                   | 4.30                   | -0.48                  | -4.46                    | -3.38                   | -3.94                   | 4.32                   | -0.52                  | -3.50                    |
| Phe820 | -7.18                   | -0.58                   | 0.90                   | -0.58                  | -6.30                    | -5.82                   | -0.42                   | 0.76                   | -0.90                  | -5.54                    |
